# Supplementary material
Source: ML conference proceedings conference paper supplement (https://openreview.net/forum?id=f6r1mYwM1g)

Enhancement loss with different sets of neurons

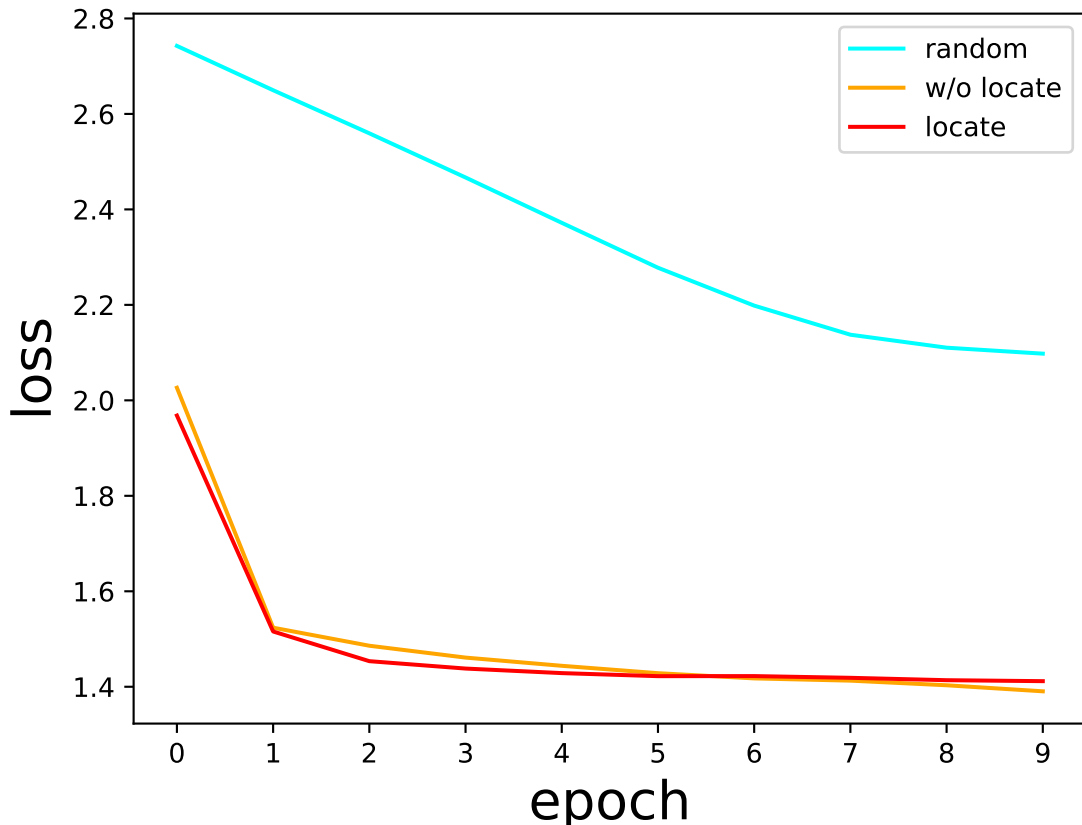

Supplement: supplementary_material [file attachment]

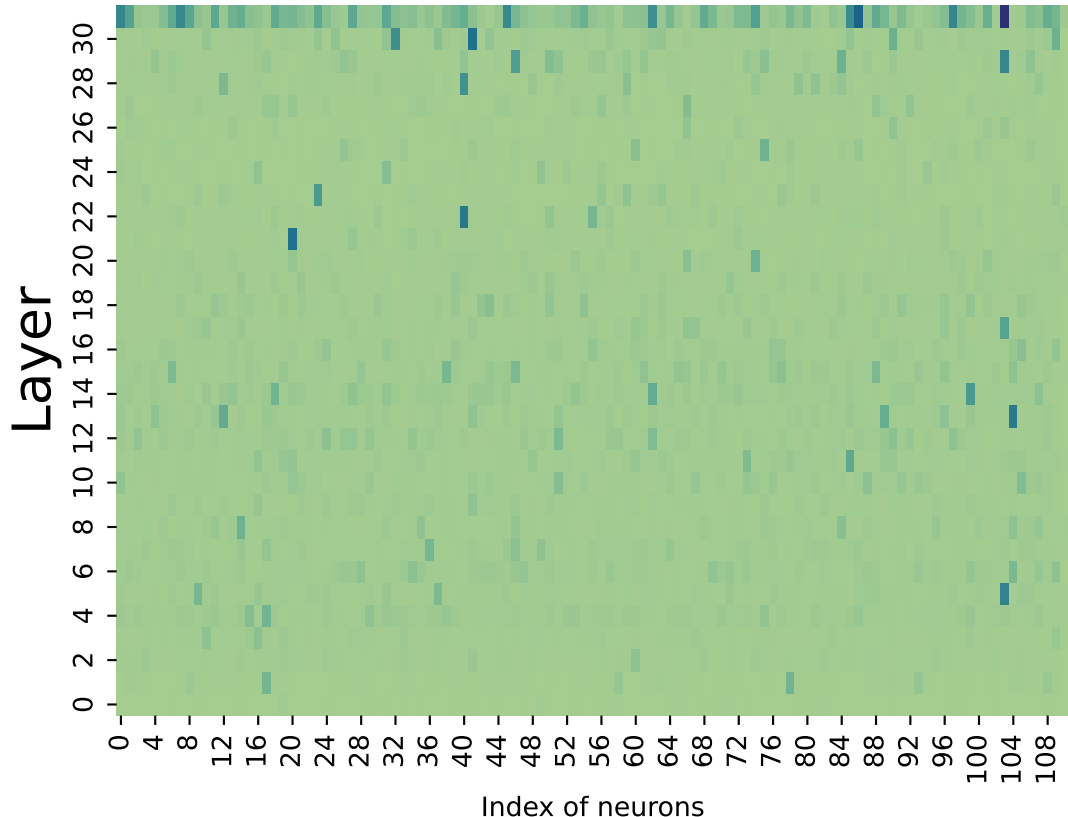

Supplement: supplementary_material [file attachment]

Enhancement loss with different sets of neurons

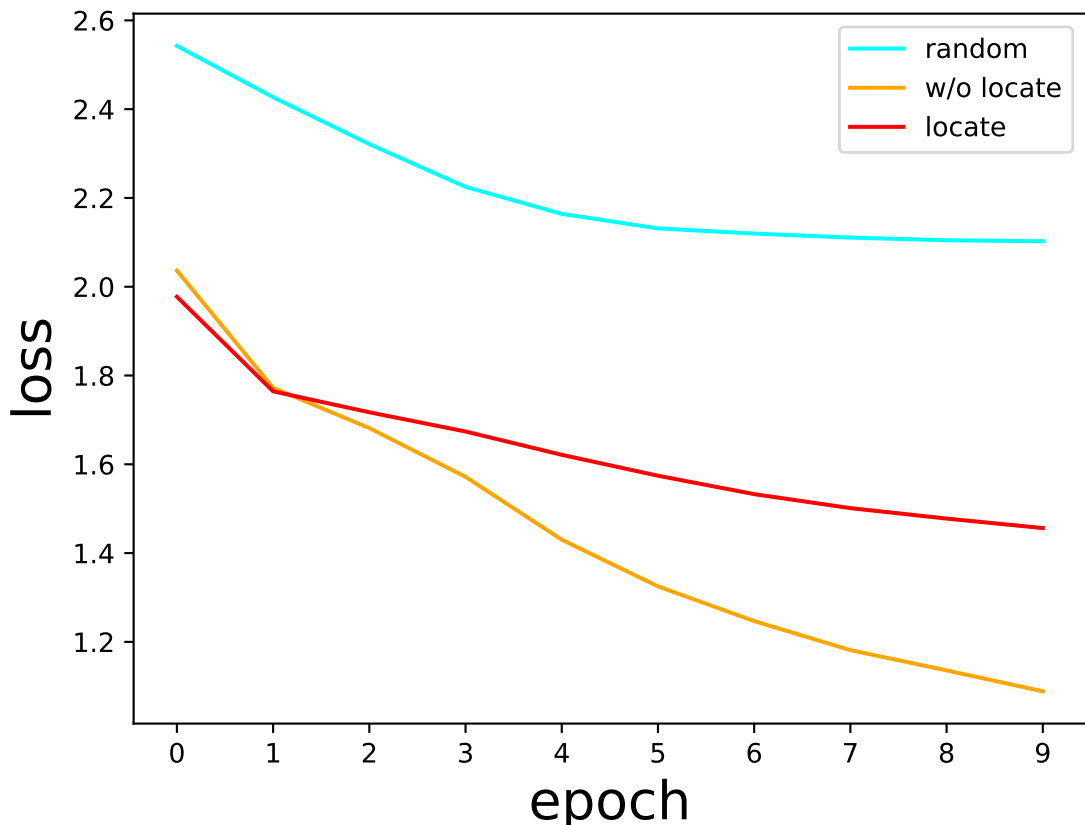

Supplement: supplementary_material [file attachment]

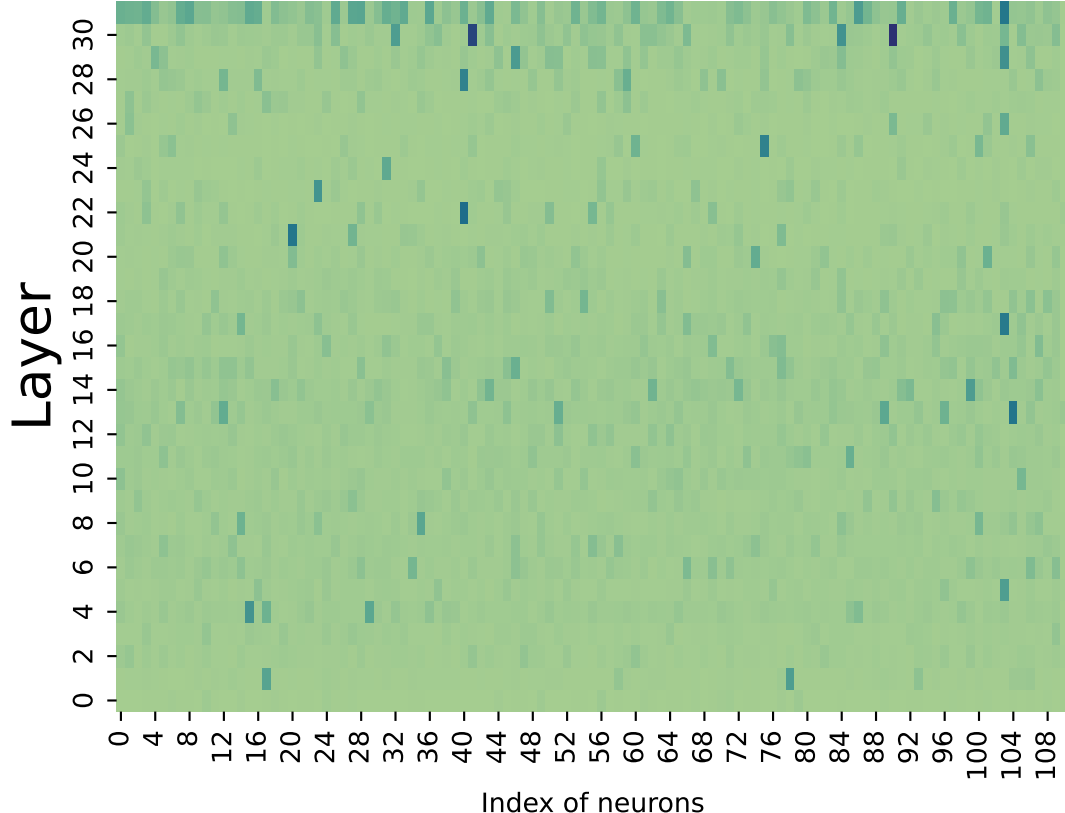

Supplement: supplementary_material [file attachment]

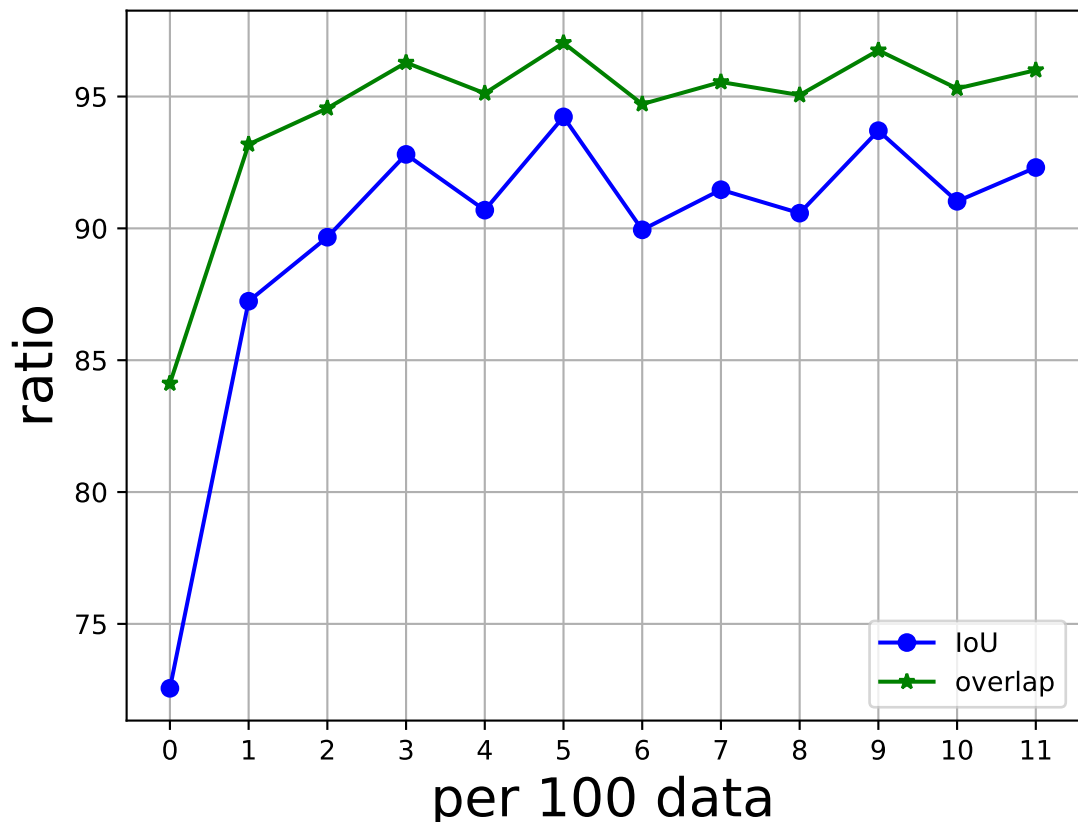

Supplement: supplementary_material [file attachment]

Enhancement loss with different sets of neurons

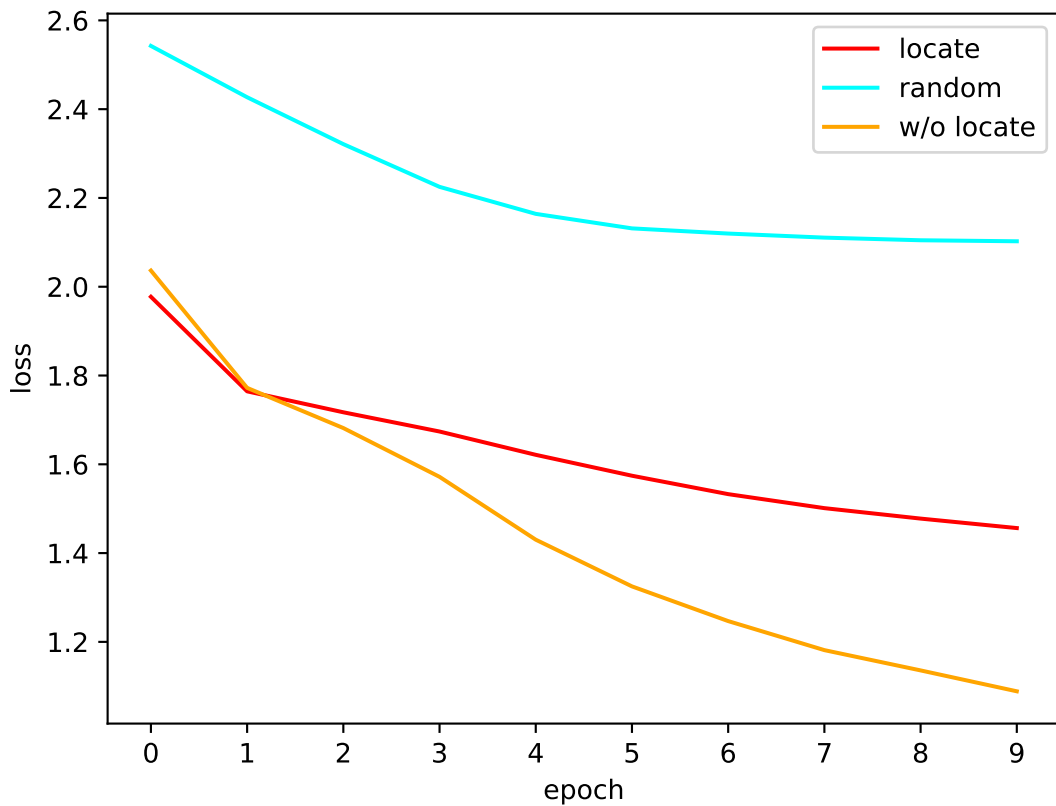

Supplement: supplementary_material [file attachment]

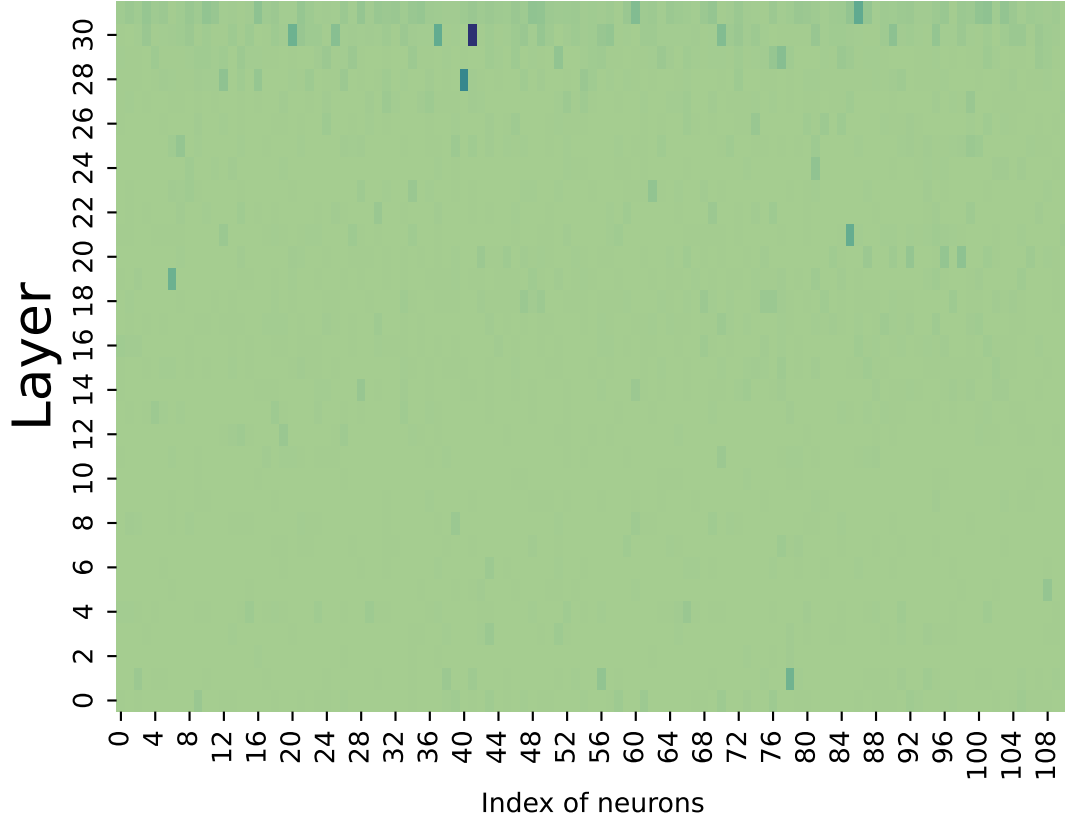

Supplement: supplementary_material [file attachment]

Enhancement loss with different sets of neurons

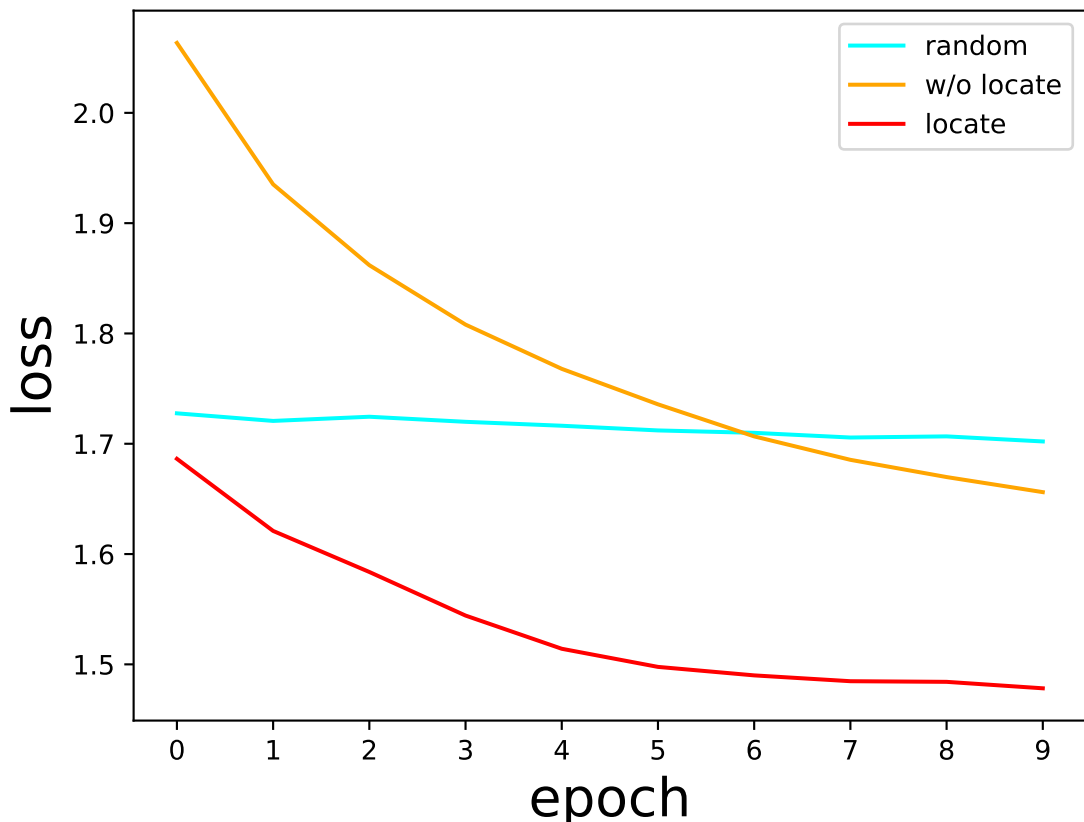

Supplement: supplementary_material [file attachment]

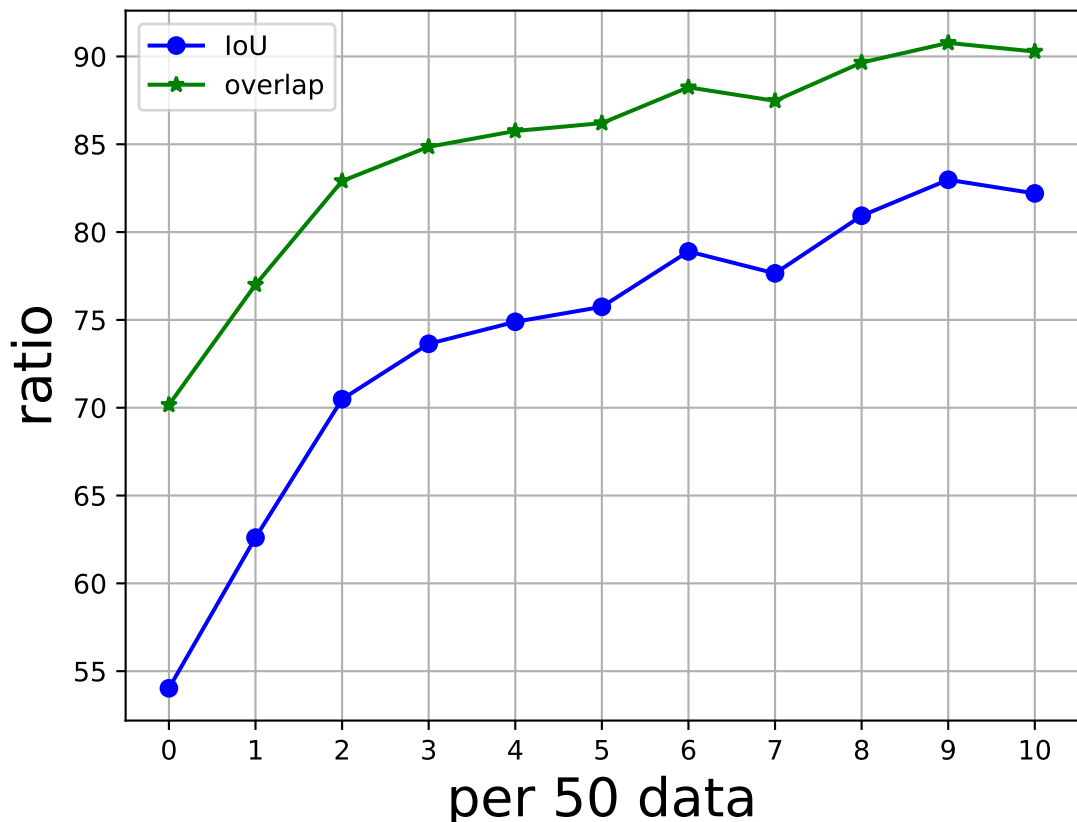

Supplement: supplementary_material [file attachment]

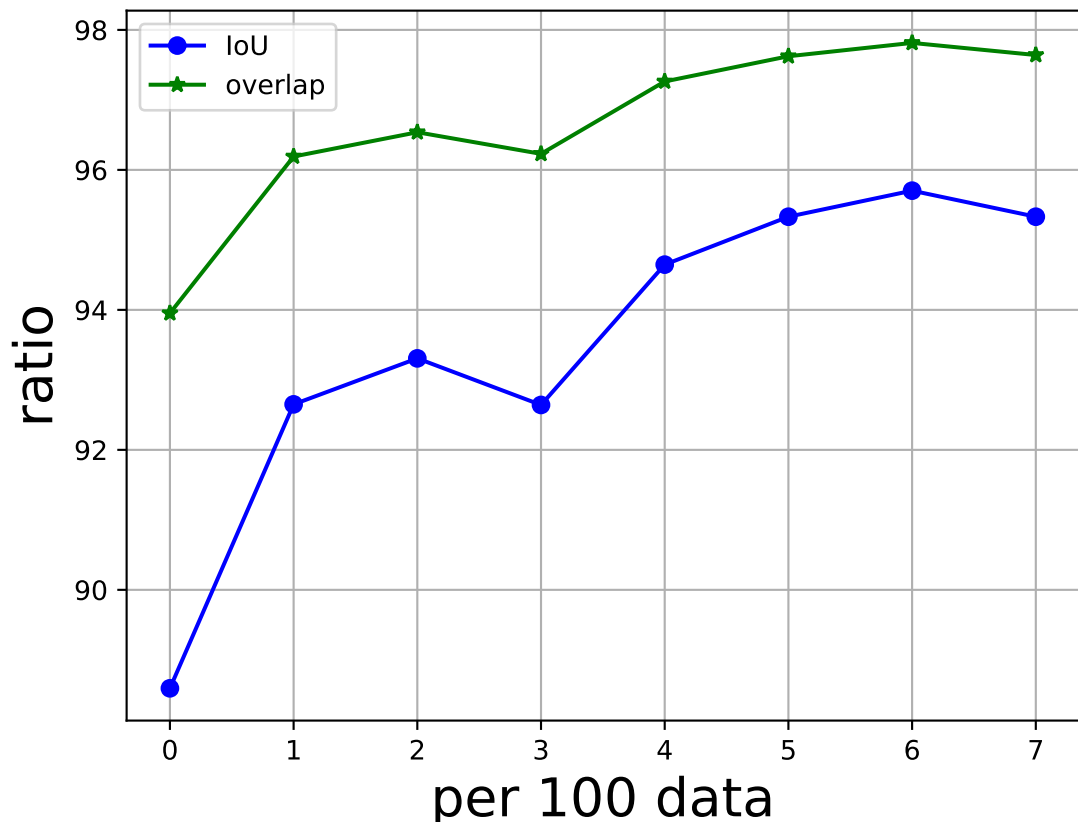

Supplement: supplementary_material [file attachment]

Enhancement loss with different sets of neurons

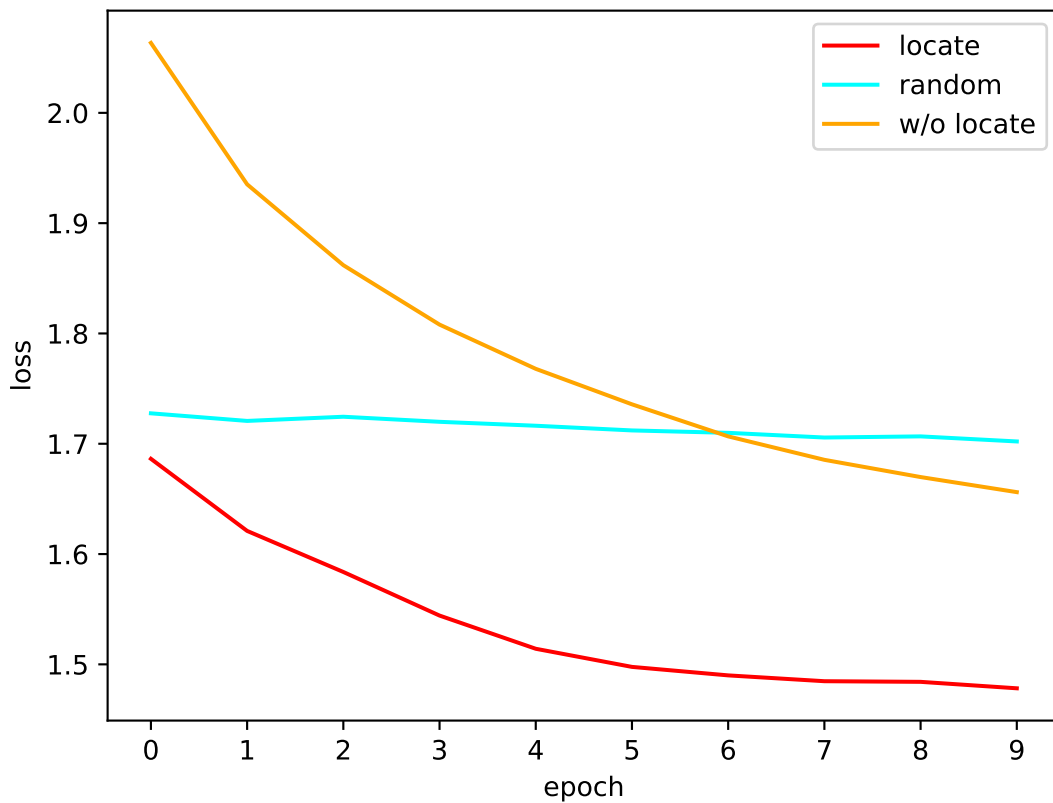

Supplement: supplementary_material [file attachment]

Enhancement loss with different sets of neurons

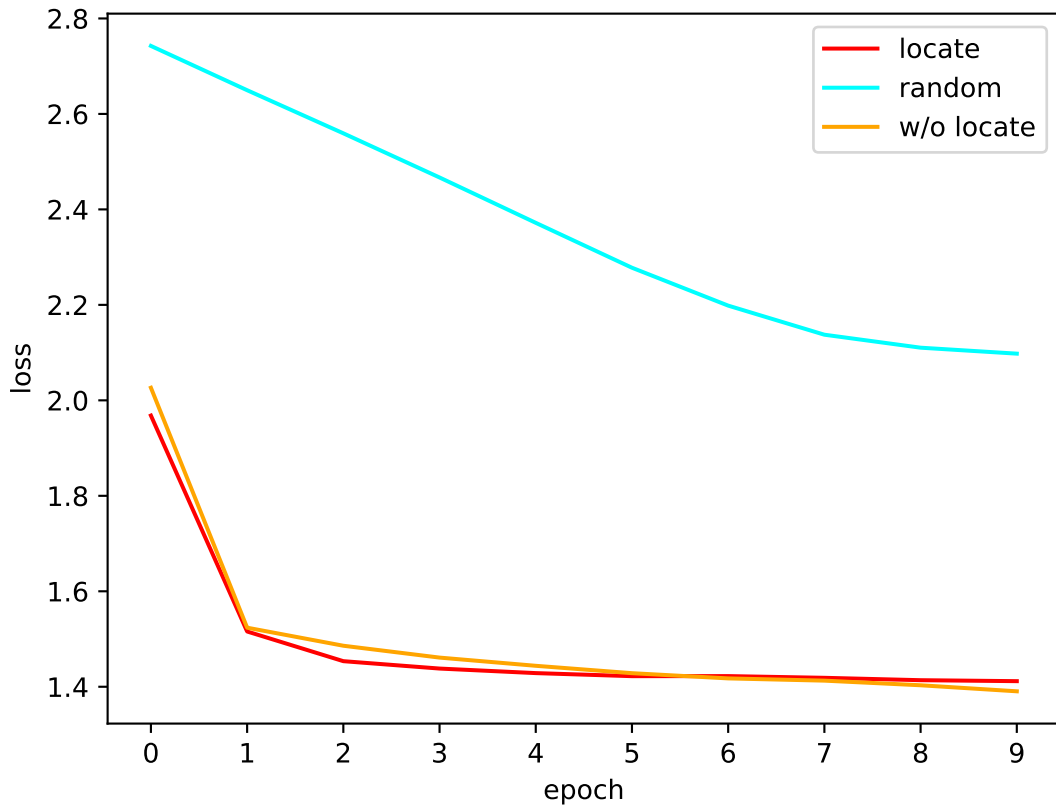

Supplement: supplementary_material [file attachment]
